# Supplementary material
Source: Springer Nature journal article supplement (https://www.springermedizin.de/resource/supplementary/12887_2010_417_MOESM4_ESM.pdf/9475162)
Supplement: MOESM4 [file 9475162]

## **Reminders for the paediatrician**

### **Identify**

Scan the KLIK PROfile at the current date. Which colour dominates?

In which domain do you identify problems?

For which items do you identify problems?

Is there improvement or deterioration compared to the previous assessment?

Graphs: How is the child doing compared to healthy peers?

### **Discuss**

Discuss the KLIK PROfile at a convenient moment during the consultation

Use the KLIK PROfiles as a guide or supplement during the consultation

Frequently ask the patient for confirmation

Open the discussion with, e.g.: 'I see that you reported that ...'

Discuss the red and orange answers. Use the decision tree as a guide

If the answers are (almost) all green, ask for confirmation

If there are a lot of red and orange answers, discuss the domains only

Check if the child or parent wants to discuss topics other than those on the KLIK PROfile

Summarize the most important issues

### **Take action**

Take action when asked for help

Come back to this action at the next consultation
